# Supplementary material
Source: PubMed Central journal article supplement (PMC7036335)

22L

RML

ME7

mCWD

GPI-RML

PrP<sup>Sc</sup>

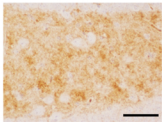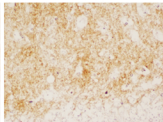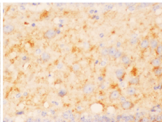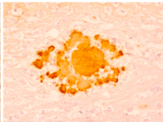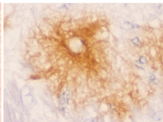

Alcian blue

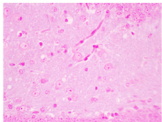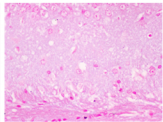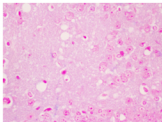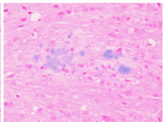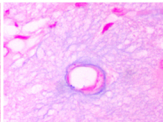

Online resource 3

Supplement: NIHMS1541751-supplement-401_2019_2085_MOESM5_ESM.pdf [file NIHMS1541751-supplement-401_2019_2085_MOESM5_ESM.pdf]

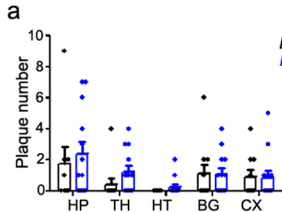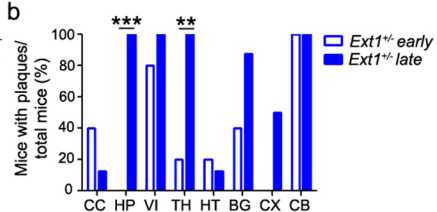

Supplement: NIHMS1541751-supplement-401_2019_2085_MOESM6_ESM.pdf [file NIHMS1541751-supplement-401_2019_2085_MOESM6_ESM.pdf]

a

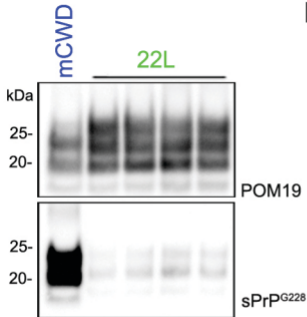

b

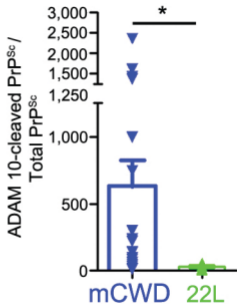

Supplement: NIHMS1541751-supplement-401_2019_2085_MOESM7_ESM.pdf [file NIHMS1541751-supplement-401_2019_2085_MOESM7_ESM.pdf]
